# 1 Single-cell RNA-sequencing of 2 differentiating iPS cells reveals dynamic 3 genetic effects on gene expression

4  
5  
6 Anna SE Cuomo<sup>1,\*</sup>, Daniel D Seaton<sup>1,\*</sup>, Davis J McCarthy<sup>1,4,\*</sup>, Iker Martinez<sup>2</sup>, Marc Jan  
7 Bonder<sup>1,3</sup>, Jose Garcia-Bernardo<sup>2</sup>, Shradha Amatya<sup>2</sup>, Pedro Madrigal<sup>2,7,8</sup>, Abigail Isaacson<sup>2</sup>,  
8 Florian Buettner<sup>1</sup>, Andrew Knights<sup>2</sup>, Kedar Nath Natarajan<sup>2,†</sup>, HipSci Consortium, Ludovic  
9 Vallier<sup>2,7,8,#</sup>, John C Marioni<sup>1,2,5,#</sup>, Mariya Chhatriwala<sup>2,#,\*</sup>, Oliver Stegle<sup>1,3,6,#,\*</sup>

10  
11 <sup>1</sup> European Molecular Biology Laboratory, European Bioinformatics Institute, Wellcome Genome Campus, CB10 1SD Hinxton,  
12 Cambridge, UK

13 <sup>2</sup> Wellcome Sanger Institute, Wellcome Genome Campus, Hinxton, CB10 1SA, UK

14 <sup>3</sup> European Molecular Biology Laboratory, Genome Biology Unit, 69117 Heidelberg, Germany

15 <sup>4</sup> St Vincent's Institute of Medical Research, Fitzroy, Victoria 3065, Australia.

16 <sup>5</sup> Cancer Research UK Cambridge Institute, University of Cambridge, Cambridge, UK

17 <sup>6</sup> Division of Computational Genomics and Systems Genetics, German Cancer Research Center (DKFZ), 69120, Heidelberg,  
18 Germany.

19 <sup>7</sup> Wellcome Trust – MRC Cambridge Stem Cell Institute, Anne McLaren Laboratory, University of Cambridge, Cambridge CB2  
20 0SZ, UK

21 <sup>8</sup> Department of Surgery, University of Cambridge, Cambridge CB2 0QQ, UK

22 <sup>†</sup> Current address: Danish Institute of Advanced Study (D-IAS), Functional Genomics and Metabolism Unit, University of Southern  
23 Denmark, Denmark

24  
25  
26 \* These authors contributed equally to this work.

27 # Corresponding authors

## 28 Abstract

29 Recent developments in stem cell biology have enabled the study of cell fate decisions in early  
30 human development that are impossible to study *in vivo*. However, understanding how  
31 development varies across individuals and, in particular, the influence of common genetic  
32 variants during this process has not been characterised. Here, we exploit human iPS cell lines  
33 from 125 donors, a pooled experimental design, and single-cell RNA-sequencing to study  
34 population variation of endoderm differentiation. We identify molecular markers that are  
35 predictive of differentiation efficiency, and utilise heterogeneity in the genetic background  
36 across individuals to map hundreds of expression quantitative trait loci that influence  
37 expression dynamically during differentiation and across cellular contexts.

## 38 Introduction

39 The early stages of human embryogenesis involve dramatic and dynamic changes in cellular  
40 states. However, the extent to which an embryo's genetic background influences this process  
41 has only been determined in a small number of special cases linked to rare large-effect  
42 variants that cause developmental disorders. This lack of information is critical - it can provide  
43 a deep understanding of how genetic heterogeneity is tolerated in normal development, when  
44 controlling the expression of key genes is vital. Additionally, with cellular reprogramming  
45 becoming an increasingly used tool in molecular medicine, understanding how inter-individual  
46 variability effects such differentiations is key.

47  
48 Critically, recent technological developments have begun to facilitate such studies *in vitro*. In  
49 particular, the generation of population-scale collections of human induced pluripotent stem  
50 cells (iPSCs) [1,2] has allowed for assessing regulatory genetic variants in pluripotent [1,2] as  
51 well as in differentiated cells [3–5]. In addition, the rapid developments in single-cell RNA-seq  
52 now allow for assessing the molecular impact of genetic variability in a continuous manner  
53 across early human development.

54  
55 Here, we use a pooled cell differentiation assay to study endoderm differentiation across a set  
56 of 125 human iPSC lines, profiling changes in gene expression via single-cell RNA-  
57 sequencing at 4 developmental timepoints [6]. Our study not only allows discovery of hundreds  
58 of novel expression Quantitative Trait Loci (eQTL) that vary across differentiation, but also  
59 enables the uncovering of genetic variants that impact the rate at which a cell line  
60 differentiates. Finally, we generalise approaches from studies of the interaction between  
61 genotype and environment (GxE) by leveraging the single-cell resolution of our study to  
62 investigate the interplay between genetic factors and cellular states.

## 63 Population-scale single-cell profiling of differentiating iPSC cells

64 We considered a panel of well-characterized human iPSC lines derived from 125 unrelated  
65 donors from the Human Induced Pluripotent Stem Cell initiative (HipSci) collection [1]. In order  
66 to increase throughput and mitigate the effects of batch variation, we exploited a novel pooled  
67 differentiation assay, combining sets of four to six lines in one well prior to differentiation (28  
68 differentiation experiments performed in total; hereon “experiments”; **Fig. 1A, S1, S2**). Cells  
69 were collected at four differentiation time points (iPSC; one, two and three days post initiation  
70 - hereon day0, day1, day2 and day3) and their transcriptomes were assayed using full-length  
71 RNA-sequencing (Smart-Seq2 [7]) alongside the expression of selected cell surface markers  
72 using FACS (TRA-1-60, CXCR4; **Fig. S3, S4; Methods**). Following quality control (QC),  
73 36,044 cells were retained for downstream analysis, across which 11,231 genes were  
74 expressed (**Fig. S5; Methods**). Exploiting that each cell line’s genotype acts as a unique  
75 barcode, we demultiplexed the pooled cell populations, enabling identification of the cell line  
76 of origin for each cell (similar to [8]; **Methods**). At each time point, cells from between 104 and  
77 112 donors were captured, with each donor being represented by an average of 286 cells  
78 (after QC, **Fig. S2; Tables S1, S2; Methods**). The success of the differentiation protocol was  
79 validated using canonical cell-surface marker expression: consistent with previous studies [9],  
80 an average of 72% cells were TRA-1-60(+) in the undifferentiated state (day0) and an average  
81 of 49% of cells were CXCR4(+) three days post differentiation (day3; **Fig. S3**).

82  
83 Variance component analysis across all genes (using a linear mixed model; **Methods**)  
84 revealed the time point of collection as the main source of variation, followed by the cell line  
85 of origin and the experimental batch (**Fig. 1B**). Consistent with this, the first Principal  
86 Component (PC) was strongly associated with differentiation time (**Fig. 1C, S6; Methods**),  
87 motivating its use to order cells by their differentiation status (hereafter “pseudotime”, **Fig. 1C**).  
88 Alternative pseudotime inference methods yielded similar orderings (**Fig. S7; Methods**).

89  
90 Critically, the expected temporal expression dynamics of marker genes that characterise  
91 endoderm differentiation was captured by the ordering of cells along the inferred pseudotime  
92 (**Fig. 1D**). Exploiting these markers of differentiation progress and pseudotime, we assigned  
93 28,971 cells (~80%) to one of three canonical stages of endoderm differentiation: iPSC,  
94 mesendoderm (mesendo) and definitive endoderm (defendo) (**Fig. 1C, S8; Methods**). A  
95 smaller fraction of cells (N = 7,073) could not be confidently assigned to a canonical stage of  
96 differentiation; these cells were heavily enriched for those collected at day2, when rapid  
97 changes in molecular profiles are expected, reflecting a transitional population of cells.

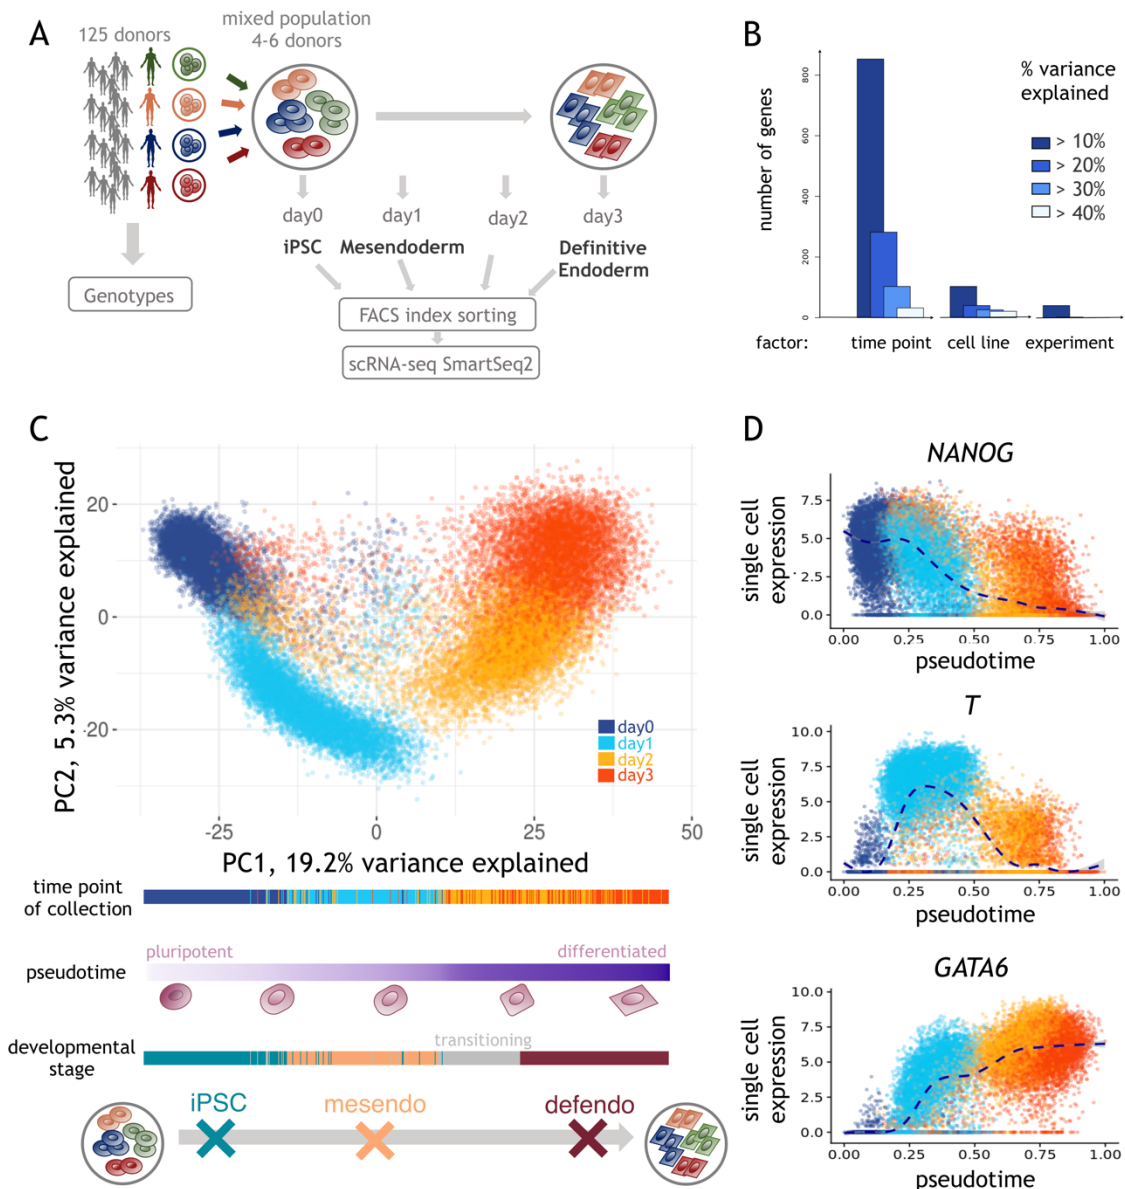

98  
99  
100  
101  
102  
103  
104  
105  
106  
107  
108  
109  
110  
111  
112

**Figure 1 | Single-cell endoderm differentiation of pooled iPSC lines.**

(A) Overview of the experimental design. iPSC lines from 125 genotyped donors were pooled in sets of 4-6, across 28 experiments, followed by differentiation towards definitive endoderm. Cells were sampled every 24 hours (Methods) and molecularly profiled using scRNA-seq and FACS. (B) Variance component analysis of 4,546 highly variable genes, using a linear mixed model fit to individual genes to decompose expression variation into time point of collection, cell line and experimental batch (Methods). (C) Top: Principal component analysis of gene expression profiles for 36,044 QC-passing cells. Cells are coloured by the time point of collection. Bottom: Cells are ordered by pseudotime, defined as the first principal component (PC1). From left to right, cells transition from a pluripotent state to definitive endoderm. (D) Single cell expression (y axis) of selected markers for each developmental stage, spanning iPSC (NANOG), mesendo (T), and defendo (GATA6) stages, plotted along pseudotime (x axis).

## 113 Pseudo-temporal ordering yields stage-specific eQTL

114 Motivated by the observation that a substantial fraction of variability in gene expression was  
115 explained by cell-line effects (**Fig. 1B**), we tested for associations between common genetic  
116 variants and gene expression at the three defined stages of cell differentiation (**Fig. 1C**).  
117 Briefly, for each donor, experimental batch, and differentiation stage, we quantified each  
118 gene's average expression level (**Methods**), before using a linear mixed model to test for *cis*  
119 eQTL, adapting approaches used for bulk RNA-seq profiles (+/- 250kb, MAF > 5% [1];  
120 **Methods**). In the iPSC population (day0), this identified 1,833 genes with at least one eQTL  
121 (denoted eGenes; FDR < 10%; 10,840 genes tested; **Table S3**). To validate our approach, we  
122 also performed eQTL mapping using deep bulk RNA-sequencing data from the same set of  
123 iPSC lines ("iPSC bulk"; 10,736 genes tested), yielding consistent eQTL (~70% replication of  
124 lead eQTL effects; nominal P < 0.05; **Methods; Table S4**).

125  
126 Analogously, we mapped eQTL in the mesendo and defendo populations, yielding 1,702 and  
127 1,342 eGenes respectively. For comparison, we also performed eQTL mapping in cells  
128 collected on day1 and day3 -- the experimental time points commonly used to identify cells at  
129 mesendo and defendo stages [6]. Interestingly, this approach identified markedly fewer  
130 eGenes (1,181 eGenes at day1, and 631 eGenes at day3), demonstrating the power of using  
131 the single-cell RNA-seq profiles to define relatively homogeneous differentiation stages in a  
132 data-driven manner (**Fig. 2B, S9; Methods; Table S5**).

133  
134 Profiling multiple stages of endoderm differentiation allowed us to assess at which stage along  
135 this process individual eQTL can be detected. We observed substantial regulatory and  
136 transcriptional remodelling upon iPS differentiation to definitive endoderm, with over 30% of  
137 eQTL being specific to a single stage (**Fig. 2A, 2C; Methods**). Our differentiation time course  
138 covers developmental stages that have never before been accessible to genetic analyses of  
139 molecular traits. Consistent with this, 349 of our eQTL variants at the mesendo and defendo  
140 stages have not been reported in either a recent iPSC eQTL study based on bulk RNA-seq  
141 [10], or in a compendium of eQTL identified from 49 tissues as part of the GTEx project [11]  
142 (linkage disequilibrium, LD:  $r^2 < 0.2$ ; **Methods; Table S3**).

143  
144 In addition to these novel eQTL, we identified lead switching events for 155 eGenes, that is  
145 distinct lead eQTL variants for the same gene at different stages of differentiation (LD:  $r^2 < 0.2$ ;  
146 **Methods**). To investigate the potential regulatory role of such variants, we examined whether  
147 the corresponding genetic loci also featured changes in histone modifications during  
148 differentiation. Specifically, we used ChIP-Sequencing to profile five histone modifications  
149 associated with gene and enhancer usage (H3K27ac, H3K4me1, H3K4me3, H3K27me3,  
150 H3K36me3) in hESCs that were differentiated (using the same protocol employed above)  
151 towards endoderm and measured at equivalent time points (i.e. day0, day1, day2, day3;  
152 **Methods**). Intriguingly, for 20 of the lead switching events, we observed corresponding  
153 changes in the epigenetic landscape (stage-specific lead variants overlap with stage-specific  
154 changes in histone modification status), suggesting a direct mode of action (**Fig. 2D**).

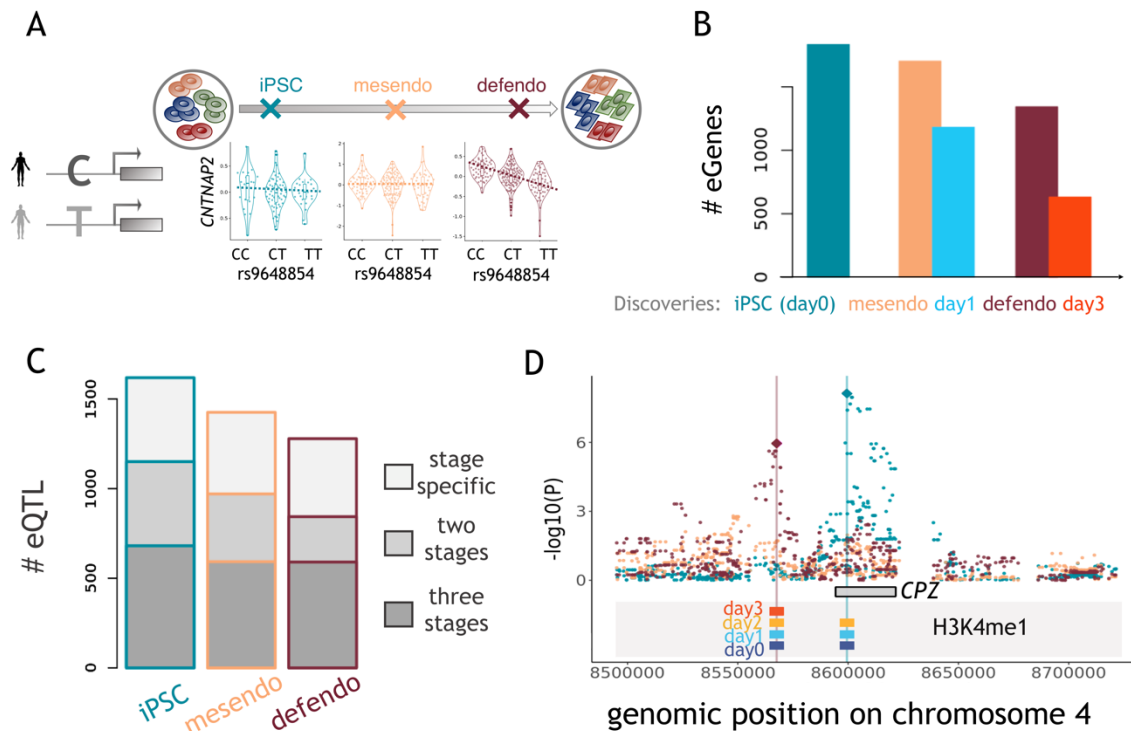

155  
156  
157  
158  
159  
160  
161  
162  
163  
164  
165  
166  
167  
168

**Figure 2 | Mapping single-cell eQTL in each developmental stage.** (A) Illustration of the single cell eQTL mapping strategy at different stages of differentiation. Shown is an example of an eQTL that is specific to the defendo stage. Boxplots of gene expression stratified by the allelic state of rs9648854 at each stage, showing an association between rs9648854 and *CNTNAP2* expression at the defendo stage, but not at earlier stages. (B) Comparison of eQTL mapping using different strata of all cells. Stage definition based on pseudotime ordering increases the number of detectable eQTL, compared to using the time point of collection. Bars represent number of eGenes (genes with at least one eQTL, at FDR < 10%). (C) Proportion of eQTL that are specific to a single stage, shared across two stages, or observed across all stages (sharing defined as a lead eQTL variant at one stage with nominal significant effects  $P < 0.05$  and consistent direction at another stage). (D) A lead switching event consistent with epigenetic remodelling. The overlap of H3K4me1 with the eQTL SNPs across differentiation time points is indicated by the coloured bars.



## 169 eQTL variants and early molecular markers are predictive of 170 differentiation efficiency

171 Previous studies have demonstrated that iPSC lines vary in their capacity to differentiate [12].  
172 As a measure of differentiation efficiency in our experiments, we used average pseudotime  
173 on day3, and observed significant variation across cell lines, which was consistent across  
174 replicate differentiations of the same cell line (**Fig. 3A**). Exploiting the scale of our study and  
175 the pooled experimental design, we set out to identify genetic and molecular markers of  
176 differentiation efficiency that are accessible prior to differentiation (**Methods**).

177  
178 First, we considered the set of 4,422 eQTL lead variants at any of the three developmental  
179 stages and tested each variant for association with differentiation efficiency (**Fig. 3B**; using a  
180 linear mixed model; **Methods**). This identified 5 eQTL variants at a lenient false discovery rate  
181 threshold (FDR 20%; **Fig. 3B, Table S6**). The most significant associations were observed  
182 with eQTL variants for *DPH3* ( $P = 3.9e-5$ ) and *H2AFY2* ( $P = 1e-4$ ). Loss of *DPH3* results in an  
183 embryonic lethal phenotype in mice [13], while the effect direction of the eQTL variant for  
184 *H2AFY2* was consistent with observations that knockdown of this gene inhibits endoderm  
185 differentiation of human iPSCs *in vitro* [14]. In order to further investigate these associations,  
186 we used staining for the percentage of CXCR4+ as an independent measure of differentiation  
187 efficiency [15]. CXCR4+ staining data on the same lines enabled replication of 3/5 of these  
188 associations ( $P < 0.05$ ; one-tailed test). We also performed an additional set of differentiations  
189 in iPSC lines derived from individuals that were not part of the variant discovery, selected  
190 based on genotype at the *DPH3* eQTL locus ( $n = 20$ ). While the direction of effect was  
191 consistent, the association was not statistically significant ( $P = 0.24$ ), likely reflecting low power  
192 at this sample size. Collectively, these results indicate that our approach can reveal genetic  
193 determinants of *in vitro* differentiation efficiency.

194  
195 Having identified genetic markers associated with differentiation capacity we next asked  
196 whether the average expression level of genes at the iPSC stage could represent molecular  
197 markers of differentiation efficiency. This revealed 38 associations (FDR 10%, 11,231 genes  
198 tested; **Table S7**), 15 of which were also observed when using independent bulk RNA-seq  
199 data from the same cell lines (replication defined as nominal  $P < 0.05$ ; **Table S7; Methods**).  
200 As an example, the expression of *ZDHHC9* in iPSCs was negatively associated with  
201 differentiation efficiency (**Fig. 3C**). Furthermore, *ZDHHC9* is one of 17 differentiation-  
202 associated genes located on the X chromosome, reflecting a significant enrichment of X  
203 chromosome genes (24.5-fold enrichment,  $P = 8 \times 10^{-16}$ , Fisher's exact test). Higher expression  
204 of these genes was associated with reduced differentiation efficiency (**Fig. 3C; Methods**). The  
205 majority of these associations persisted when limiting the analysis to female lines (14/17 at  $P$   
206  $< 0.05$ ), indicating variation beyond differences between sexes. These results are consistent  
207 with previous observations that X chromosome reactivation is a marker of poor differentiation  
208 capacity of iPSCs in general [16,17]. Finally, we note that the set of associated genes located  
209 on other chromosomes included genes with known roles in iPSC differentiation, such as *TBX6*  
210 [18].

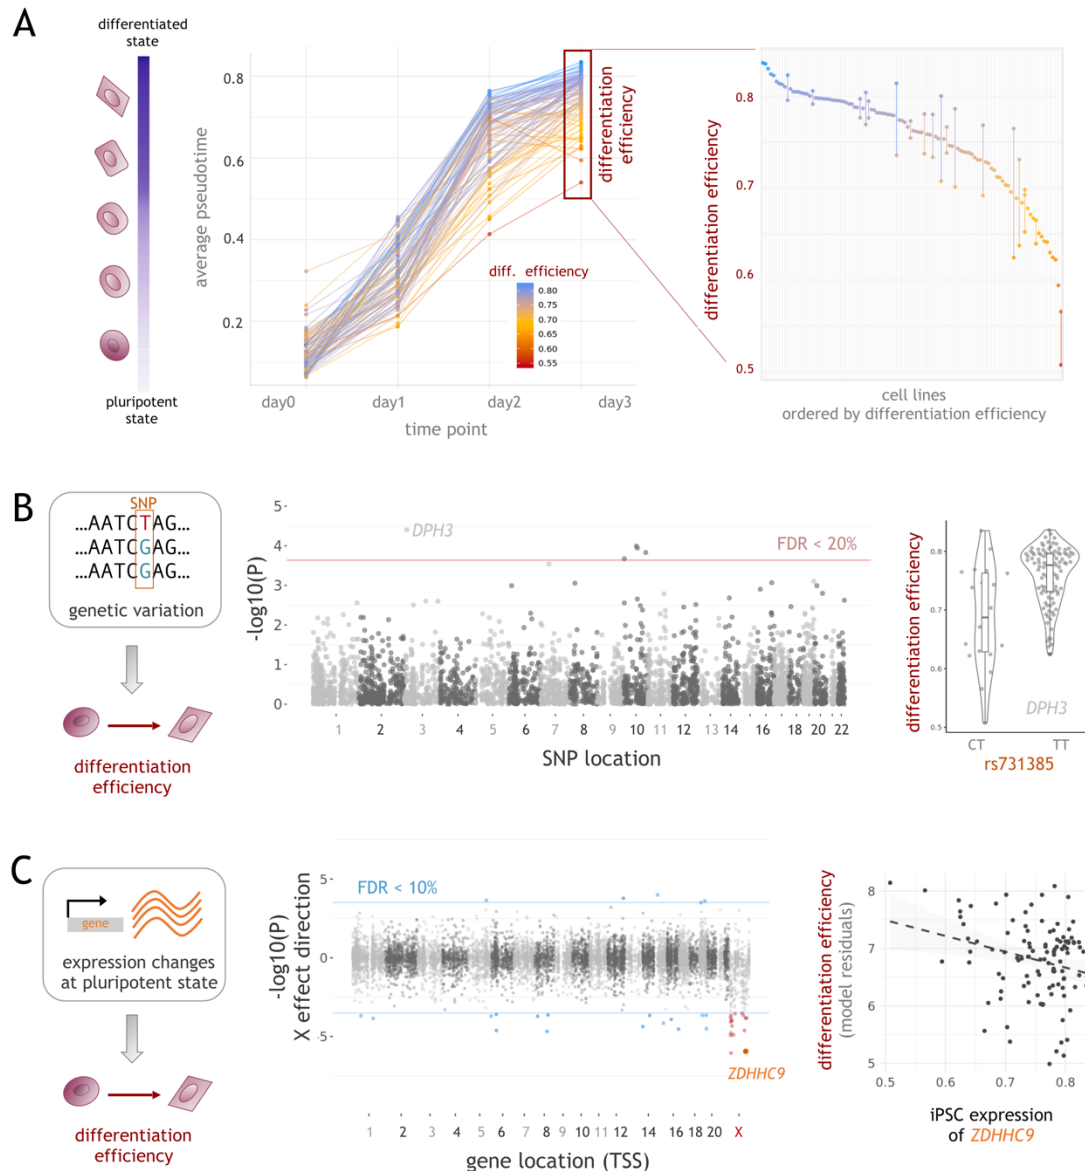

211  
212

213

**Figure 3 | Identification of molecular markers for differentiation efficiency.**

214 (A) Variation in differentiation efficiency across cell lines. **Left:** Differentiation progress over time, showing trajectories for 98 cell lines, coloured by differentiation efficiency. Shown are 98 cell lines with sufficient data at all time points (out of 126, more than 10 cells). Differentiation efficiency of a cell line was defined as the average pseudotime across all cells on day 3. **Right:** Differentiation efficiency across cell lines (points), and consistency of individual cell lines differentiated in multiple experiments (vertical bars). (B) Effects of genetic variation on differentiation efficiency. **Left:** schematic. **Center:** Manhattan plot displaying negative log P values for association tests between 4,422 lead eQTL variants and differentiation efficiency. Highlighted is an association for an eQTL variant for *DPH3*. Horizontal red line denotes FDR = 20% (Benjamini-Hochberg adjusted). **Right:** Boxplot displaying differentiation efficiency for 125 individuals stratified by the allelic state of rs73138519 (mesendo eQTL for *DPH3*), which is associated with decreased differentiation efficiency (**Methods**). (C) Associations between iPSC gene expression levels and differentiation efficiency. **Left:** schematic. **Center:** Genome-wide analysis to identify markers of differentiation efficiency, considering iPSC gene expression levels. Displayed are negative log P values signed by the direction of the effect. Horizontal blue lines denote FDR = 10% (Benjamini-Hochberg adjusted). Autosomal genes with significant associations are shown in blue; X chromosome genes with significant associations are shown in red. **Right:** Scatter plot between gene expression in the iPSC state and differentiation efficiency for the X chromosome gene *ZDHHC9*.

220  
221  
222  
223  
224  
225  
226  
227  
228  
229  
230



## 231 Discovery of dynamic eQTL across iPSC differentiation

232 The availability of large numbers of cells per donor across the differentiation trajectory enabled  
233 the analysis of dynamic changes of eQTL strength at fine-grained resolution. Using a sliding-  
234 window approach (25% cells in each window, sliding along pseudotime by a step of 2.5%  
235 cells), we assessed how the joint set of 4,422 eQTL lead variants (4,470 SNP-gene pairs)  
236 discovered at the iPSC, mesendo, and defendo stages were modulated by developmental  
237 time. To do this, we reassessed each eQTL in each window, recording a SNP effect size per  
238 window (**Methods**). As a complementary approach, we also took advantage of the full length  
239 transcript sequencing to measure allele-specific expression (ASE) in each window (**Fig. 4A**  
240 **top panel; Methods**). Here, in each window, we quantified the deviation from 0.5 of the  
241 expression of the minor allele at the eQTL (ratio of reads phased to eQTL variants, **Methods**).  
242 Both methods result in a measure of the varying strength of genetic effects along development,  
243 or genetic effect dynamics. Reassuringly, the two approaches were highly consistent across  
244 pseudotime (**Fig. 4A, S10**).

245  
246 To formally test for eQTL effects that change dynamically across differentiation (dynamic  
247 QTL), we tested for associations between pseudotime and the genetic effect size (defined  
248 based on ASE; likelihood ratio test, considering linear and quadratic pseudotime), uncovering  
249 a total of 785 time dynamic eQTL (FDR < 10%; **Methods**), including a substantial fraction of  
250 eQTL that were not stage-specific (**Table S3**). This complements our earlier analysis, which  
251 identified substantial stage-specific effects (**Fig. 2A, 2C**), by identifying subtle changes in the  
252 relationship between genotype and phenotype during differentiation. To further explore this  
253 set of genes, we clustered eQTL jointly based on the relative gene expression dynamics  
254 (global expression changes along pseudotime, quantified in sliding windows as above,  
255 **Methods**), and on the genetic effect dynamics (**Fig. 4A; Methods**). This identified four basic  
256 dynamic patterns (**Fig. 4B**): sharply decreasing (cluster A), gradually decreasing (cluster B),  
257 transiently increasing (cluster C), and gradually increasing (cluster D). As expected, stage-  
258 specific eQTL were grouped together in particular clusters (e.g. defendo specific eQTL in  
259 cluster D; **Fig. S11**). Notably, the gene expression dynamics and the eQTL dynamics tended  
260 to be distinct, demonstrating that gene expression level is not the primary mechanism  
261 governing variation in genetic effects. In particular, genetic effects were not most pronounced  
262 when gene expression was high (**Fig. 4C, 4D**).

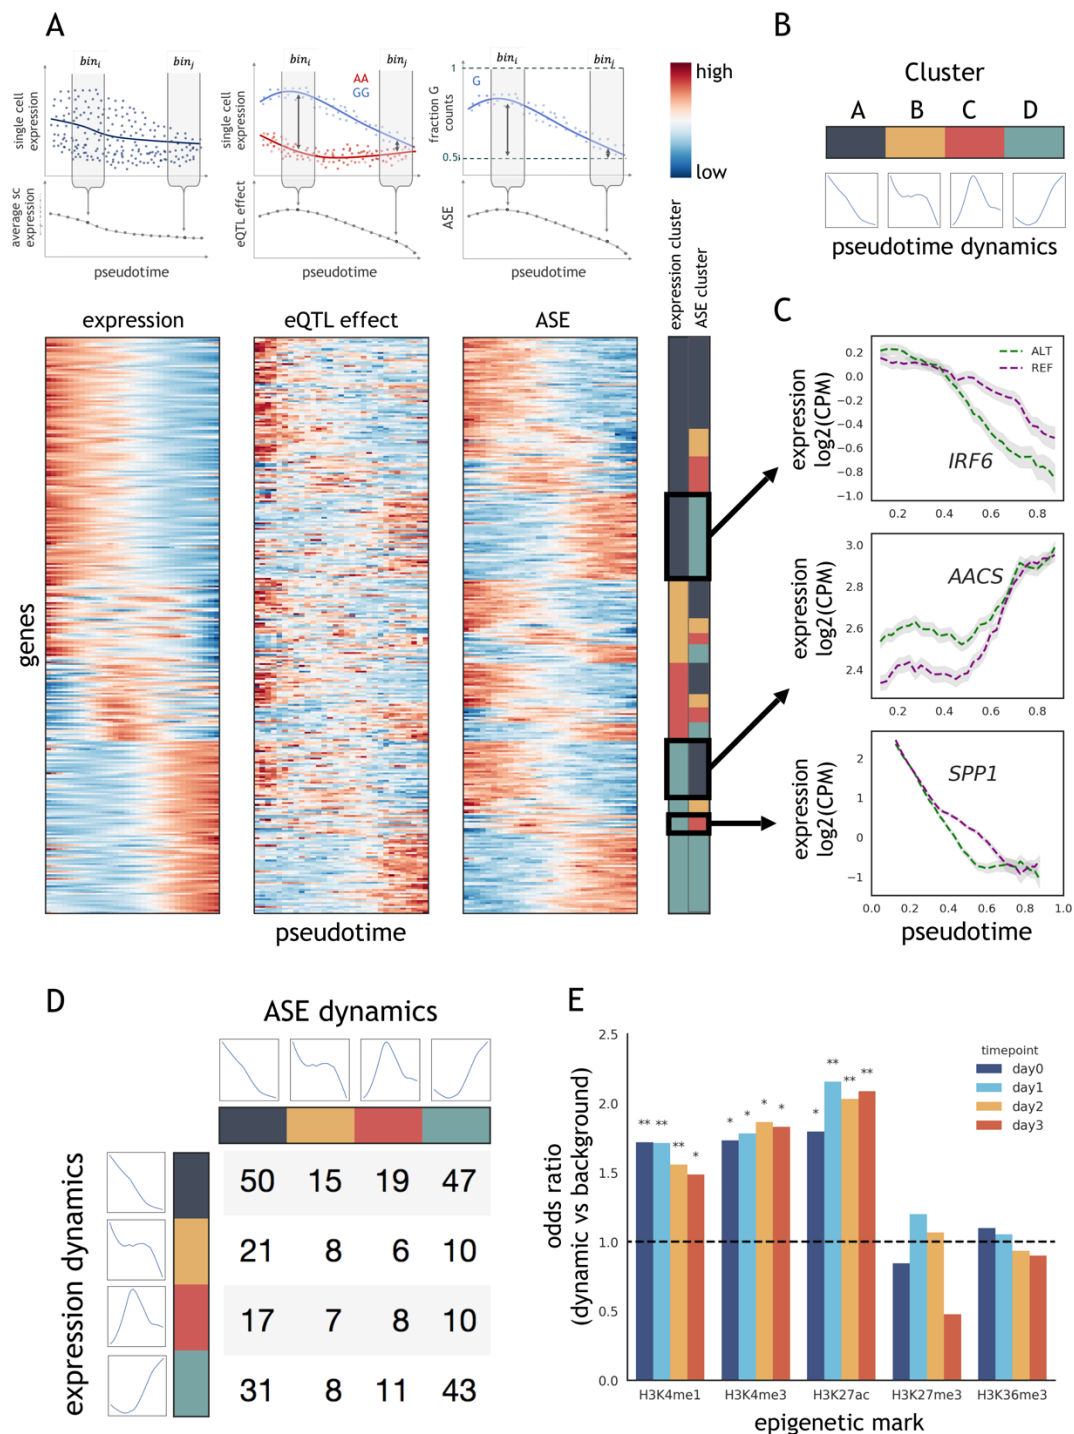

263  
264  
265  
266  
267  
268  
269  
270  
271  
272  
273  
274

**Figure 4 | eQTL dynamics during differentiation.**

(A) Combined analysis of the gene expression, ASE, and eQTL dynamics across pseudotime. **Upper panels:** Schematic of sliding window approach. Cells are binned according to pseudotime groups, to quantify average expression, perform an eQTL analysis, and quantify average ASE (each bin includes 25% of cells, binned at increments of 2.5%). **Lower panels:** clustered heatmap of expression levels, eQTL effects, and ASE across pseudotime for the top 311 genes with the strongest dynamic QTL effects (FDR < 1%; out of 785 at FDR < 10%; **Methods**). For each gene, the expression and the ASE dynamics were jointly grouped using clustering analysis, with 4 clusters. The membership of gene expression and ASE dynamics of these 4 clusters is indicated by colours in the right-hand panel. Values in all heatmaps are z-score normalised by row. For ASE, average ASE values are plotted such that red

275 indicates highest deviation from 0.5. **(B)** Summary of the identified cluster dynamics, displaying the  
276 average dynamic profile of each cluster, computed as the average across z-score normalized gene  
277 expression/ASE profiles. **(C)** Exemplars of the dynamic gene expression and dynamic genetic effects  
278 clusters shown in **A**. Shaded regions indicate standard error ( $\pm 1$  SEM; **Methods**). **(D)** Number of  
279 genes categorized by the combination of expression and ASE cluster from **A**. Average dynamics of  
280 expression clusters (rows) and ASE clusters (columns) as in **B** are shown. **(E)** Overlap of dynamic eQTL  
281 variants from **A** with histone marks. The odds ratio compared to the background of all other eQTL  
282 variants is shown (\* $P < 0.01$ ; \*\* $P < 1 \times 10^{-4}$ ; Fisher's exact test).  
283

284  
285 Distinct combinations of expression and eQTL dynamics result in different patterns of allelic  
286 expression. This is illustrated by the mesendoderm-specific eQTL for *SPP1*. Overall  
287 expression of *SPP1* decreases during differentiation, but expression of the alternative allele is  
288 repressed more quickly than that of the reference allele (**Fig. 4C**). This illustrates how *cis*  
289 regulatory sequence variation can modulates the timing of expression changes in response to  
290 differentiation, similar to observations previously made in *C. elegans* using recombinant inbred  
291 lines [19]. In other cases, the genetic effect coincides with high or low expression, for example  
292 in the cases of *IRF6* and *AACS* (**Fig. 4C**). These examples illustrate how genetic variation is  
293 intimately linked to the dynamics of gene regulation.  
294

295 We next asked whether dynamic eQTL were located in specific regulatory regions. To do this,  
296 we evaluated the overlap of the epigenetic marks defined using the hESC differentiation time  
297 series with the dynamic eQTL (**Fig. 4D, S12**). This revealed an enrichment of dynamic eQTL  
298 in H3K27ac, H3K4me1 (i.e. enhancer marks), and H3K4me3 (i.e. promoter) marks compared  
299 to non-dynamic eQTL (i.e. eQTL that we identified but did not display dynamic changes along  
300 pseudotime, **Fig. 4D**), consistent with these SNPs being located in active regulatory elements.  
301

## 302 Cellular environment modulates genetic effects on expression

303 Whilst differentiation was the main source of variation in the dataset, single cell RNA-seq  
304 profiles can be used to characterize cell-to-cell variation across a much wider range of cell  
305 state dimensions [20–22]. We identified sets of genes that varied in a co-regulated manner  
306 using clustering (affinity propagation; 8,000 most highly expressed genes; **Table S8**;  
307 **Methods**), which identified 60 modules of co-expressed genes. The resulting modules were  
308 enriched for key biological processes such as cell differentiation, cell cycle state (G1/S and  
309 G2/M transitions), respiratory metabolism, and sterol biosynthesis (as defined by Gene  
310 Ontology annotations; **Table S9**). These functional annotations were further supported by  
311 transcription factor binding (e.g. enrichment of SMAD3 and E2F7 targets in the differentiation  
312 and cell cycle modules, respectively (**Table S10, S11**)). Additionally, expression of the cell  
313 differentiation module (cluster 6; **Table S9**) was correlated with pseudotime, as expected ( $R$   
314 = 0.62; **Fig. S7**).

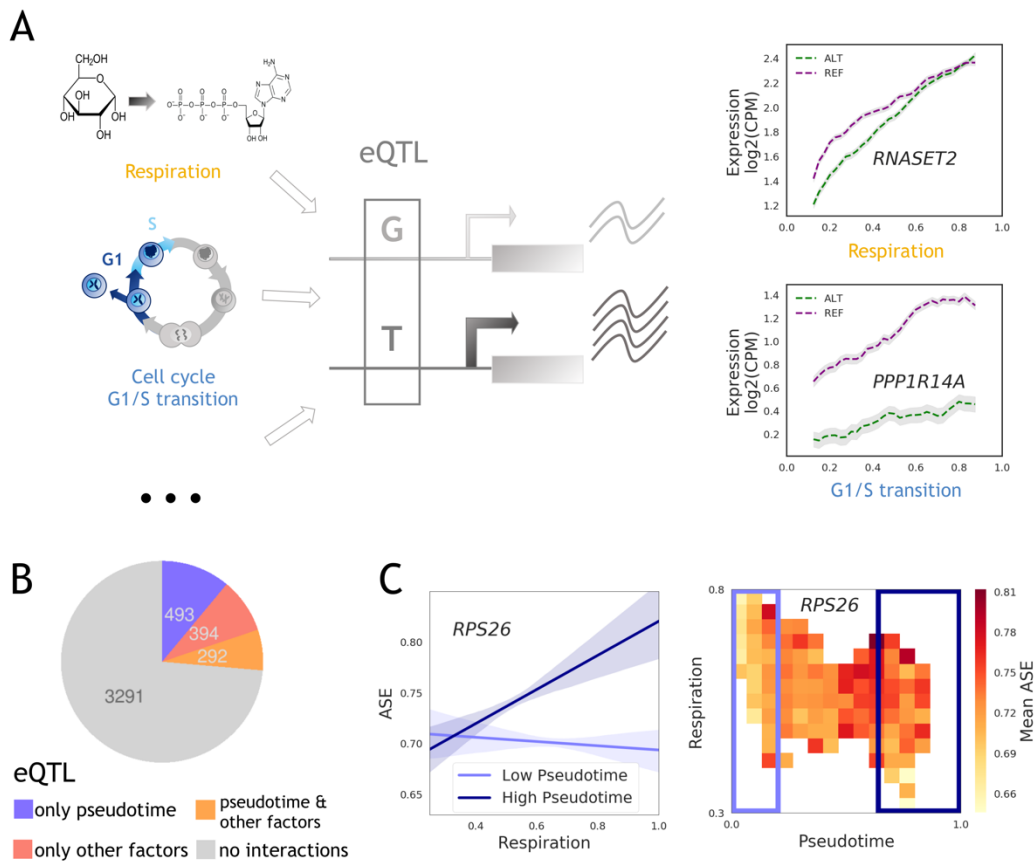

315  
316

**Figure 5 | Allele-specific expression reveals interactions with fundamental cellular processes.**

(A) Illustration of eQTL affected by cellular context. **Left:** Schematic of cellular contexts affecting a regulatory element containing an eQTL SNP, and thus affecting allele-specific expression. **Right:** Allele-specific expression variation for two exemplar eQTL SNPs that tag cancer GWAS variants and display GxE interactions (FDR < 10%). The eQTL for *RNASET2* (rs2247315) tags a risk variant for basal cell carcinoma, and is responsive to cellular respiration, while that for *PPP1R14A* (rs12608912) tags a risk variant for prostate cancer and is responsive to the cell cycle G1/S transition (**Table S12**). Cellular contexts for each cell were inferred by GO annotations of coexpression modules (**Methods**). Shaded regions indicate standard error (+/- 1 SEM; **Methods**). (B) Results summary: numbers of eQTL (from **Fig.2; Methods**) identified as displaying GxE interactions with pseudotime (purple), displaying GxE interactions with other cellular contexts but not with pseudotime, (after appropriately accounting for pseudotime, red), displaying GxE interactions with both pseudotime and at least one other cellular context (yellow), and displaying no GxE interactions at all (grey). Significance is assessed at FDR < 10%. (C) Higher order interaction example: an eQTL variant for *RPS26* (rs10876864) is affected by a GxExE higher order interaction with both pseudotime and respiration. This variant is also a risk variant for allergic disease and vitiligo. **Left panel:** Effects of respiration state on ASE for cells with low and high pseudotime. Lines shown are linear regressions with 95% confidence intervals for the 30% of cells with lowest and highest values for pseudotime. **Right panel:** Heatmap of averaged ASE for cells falling within the specified windows of pseudotime and respiration state. Only values for windows containing n > 30 cells are shown (n = 17,373 cells in total).

337 Using the same ASE-based interaction test as applied to identify dynamic QTL, reflecting ASE  
338 variation across pseudotime (**Fig. 4; Methods**), we assessed how the genetic regulation of  
339 gene expression responded to these cellular contexts. Briefly, we tested for genotype by  
340 environment (GxE) interactions using a subset of four co-expression modules as markers of  
341 cellular state, while accounting for pseudotime (**Fig. 5A; Methods**). These four co-expression  
342 modules were annotated based on GO term enrichment, and taken as markers representing  
343 cell cycle state (G1/S and G2/M transitions) and metabolic pathway activity (respiratory  
344 metabolism and sterol biosynthesis; **Methods**). This approach extends previous work using  
345 ASE to discover GxE interactions [23,24], taking advantage of the resolution provided by  
346 single-cell data. We identified 686 eQTL that had an interaction effect with at least one factor  
347 (**Fig. 5B**; FDR < 10%), with many of these effects being orthogonal to the effects of  
348 differentiation. Indeed, 394 genes had no association with pseudotime, but responded to at  
349 least one other factor. Conversely, of the 785 dynamic eQTL, 292 were also associated with  
350 other factors, while 493 were associated only with pseudotime (**Fig. 5B, S13; Tables S13;**  
351 **Methods**).

352  
353 These interactions encompass regulatory effects on genes and SNPs with important functional  
354 roles. Specifically, 145 interaction eQTL variants overlap with variants previously identified in  
355 genome-wide association studies (GWAS, LD  $r^2 > 0.8$ ; **Methods; Table S12**), including seven  
356 risk variants for cancer (EFO term: EFO\_0000311). For example, an eQTL for *RNASET2*  
357 shows sensitivity to cellular respiratory metabolic state (**Fig. 5A**). This eQTL SNP is in strong  
358 LD ( $r^2 = 1.0$ ) with a GWAS risk variant for basal cell carcinoma [25]. Furthermore, an eQTL for  
359 *PPP1R14A* showed sensitivity to the G1/S state, and is in LD ( $r^2 = 0.81$ ) with a GWAS risk  
360 variant for prostate cancer [26] (**Fig. 5A**). The onset of cancer affects cellular respiratory  
361 metabolism and cell cycle progression [27], raising the possibility that the effects of these  
362 variants are enhanced during oncogenesis. These examples illustrate the versatility of our  
363 single cell dataset and how it can provide regulatory information about variants in contexts  
364 beyond early human development.

365  
366 Finally, we explored whether we could detect higher order interaction effects, where the  
367 genetic effect varies with a cellular state in different ways along differentiation, effectively  
368 testing for GxExE interactions. To this end, we fitted a linear model with fixed effects for  
369 differentiation and each of the factors, plus a combined term (factor x pseudotime, **Fig. 5B,**  
370 **5C; Methods**). This identified 220 genes with significant higher order interactions between a  
371 genetic variant, differentiation, and at least one other factor (**Fig. 5B, 5C, S13; Table S13d**).  
372 One example is the eQTL for *RPS26*, whose ASE was sensitive to cellular respiration, but  
373 only late in differentiation (**Fig. 5C**). This eQTL variant (rs10876864) is a risk variant for allergic  
374 disease and vitiligo [28,29]. These results highlight the context-specificity of eQTL, and the  
375 power of scRNA-seq in dissecting this specificity within one set of experiments.



## 376 Discussion

377 Our map of early endoderm differentiation across 125 individuals offers a unique and powerful  
378 tool for interrogating the role of genetic heterogeneity in early human development. We  
379 exploited this resource to identify hundreds of novel eQTL that act at tightly-defined time points  
380 during early differentiation, and at specific states, thus fully utilising the power of single-cell  
381 transcriptomics. Moreover, we used our map and an independent experimental validation  
382 assay to demonstrate that specific germline variants have the potential to alter the rate of  
383 differentiation.

384  
385 More generally, this latter analysis elucidates the broad utility of our data for studying the role  
386 of genetic variation in regenerative medicine and normal development. In the case of definitive  
387 endoderm differentiation, the *in vitro* protocol is short and efficient, the molecular basis is  
388 relatively well understood, and the process is highly canalised [30]. However, most  
389 differentiation protocols are less well understood, less efficient, more variable, and require  
390 more time. Thus, we expect application of this approach in other contexts to expand our  
391 molecular understanding, improve protocol efficiency, and characterise the genetic  
392 component of differentiation across the spectrum of human development and cellular contexts.

## 393 Methods

### 394 Overview: pooled scRNA-seq profiling during endoderm differentiation

395 A total of 126 pluripotent stem cell (iPSC) lines derived from 125 donors as part of the HipSci  
396 project were considered for analysis (**Table S1**). Batches of 4-6 cell lines were co-cultured  
397 and grown as a mixed population for a total of 28 experiments, in 12 well plates. Cells were  
398 harvested immediately prior to the initiation of differentiation (day0; iPSCs), and at time points  
399 1, 2, and 3 days post differentiation initiation (day1, day2, day3). Subsequently, single cells  
400 were sorted into 384 well plates. Cells were processed using Smart-seq2 for scRNA-seq with  
401 parallel FACS analysis of the markers TRA-1-60 and CXCR4 being performed for each cell.  
402 A subset of cell lines were assayed in more than one experiment (33 donors; **Table S1, S2;**  
403 **Fig. S2**). In addition to the differentiation of pools of cell lines by co-culture for scRNA-seq,  
404 cell lines were also differentiated individually and assayed by FACS for the percentage of  
405 CXCR4+ cells on day3, following the same protocol. These individual differentiations were  
406 performed in two phases. First, individual differentiations of cell lines included in the scRNA-  
407 seq experiments were performed in parallel with the single-cell experiments. Second, an  
408 independent set of differentiations of new cell lines (i.e. cell lines derived from individuals not  
409 represented in the first set of cell lines), selected by genotype in order to validate the genetic  
410 association with differentiation, were performed as separate experiments.

### 411 Cell culture for maintenance and differentiation

412 Human iPSC lines were thawed for differentiation and maintained in Essential 8 (E8) media  
413 (LifeTech) according to the manufacturer's instructions. Prior to plating for differentiation, cells  
414 were passaged at least twice after thawing and always 3 - 4 days before plating for  
415 differentiation to ensure all the cell lines in each experiment were growing at a similar rate  
416 prior to differentiation. To plate for endoderm differentiation, cells were washed 1x with DPBS  
417 and dissociated using StemPro Accutase (Life Technologies, A1110501) at 37°C for 3 - 5 min.  
418 Colonies were fully dissociated through gentle pipetting. Cells were resuspended in MEF  
419 medium [6], passed through a 40µm cell strainer, and pelleted gently by centrifuging at 300xg  
420 for 5 min. Cells were re-suspended in E8 media and plated at a density of 15,000 cells per  
421 cm<sup>2</sup> in gelatin/MEF coated plates [6,31] in the presence of 10 µM Rock inhibitor – Y27632 [10  
422 mM] (Sigma, Cat # Y0503 - 5 mg). Media was replaced with fresh E8 free of Rock inhibitor  
423 every 24 hours post plating. Differentiation into definitive endoderm commenced 72 hours post  
424 plating as previously described [6]. The overall efficiency of the differentiation protocol was  
425 validated using reference lines with good and poor differentiation capacity, respectively (**Fig.**  
426 **S14**).

### 427 Single cell preparation and sorting for scRNAseq

428 Cells were dissociated into single cells using Accutase and washed 1x with MEF medium as  
429 described above. For all subsequent steps, cells were kept on ice to avoid degradation.  
430 Approximately 1 x 10<sup>6</sup> cells were re-suspended in PBS + 2% BSA + 2 mM EDTA (FACS  
431 buffer); BSA and PBS were nuclease-free. For staining of cell surface markers TRA-1-60  
432 (BD560380) and CXCR4 (eBioscience 12-9999-42), cells were re-suspended in 100 µL of  
433 FACS buffer with enough antibodies to stain 1 x 10<sup>6</sup> cells according to the manufacturer's  
434 instructions, and were placed on ice for 30 min. Cells were protected from light during staining

435 and all subsequent steps. Cells were washed with 5 mL of FACS buffer, passed through a 35  
436  $\mu$ M filter to remove clumps, and re-suspended in 300  $\mu$ L of FACS buffer for live cell sorting on  
437 the BD Influx Cell Sorter (BD Biosciences). Live/dead marker 7AAD (eBioscience 00-6993)  
438 was added immediately prior to analysis according to the manufacturer's instructions and only  
439 living cells were considered when determining differentiation capacities. Living cells stained  
440 with 7AAD but not TRA-1-60 or CXCR4 were used as gating controls. Data for TRA-1-60 and  
441 CXCR4 staining were available for 31,724 cells, of the total 36,044. Single-cell transcriptomes  
442 of sorted cells were assayed as follows: reverse transcription and cDNA amplification was  
443 performed according to the SmartSeq2 protocol [7], and library preparation was performed  
444 using an Illumina Nextera kit. Samples were sequenced using paired-end 75bp reads on an  
445 Illumina HiSeq 2500 machine (one lane of sequencing per 384 well plate).

## 446 Genotyping

447 iPS cell lines were genotyped as previously described [1], using the Illumina  
448 HumanCoreExome-12 Beadchip. Genotypes were called using GenomeStudio (Illumina, CA,  
449 USA), following independent imputation using IMPUTE2 v2.3.1 [32] and phasing using  
450 SHAPEIT v2.r790 [33]. Imputation was performed based on a joint reference panel of  
451 haplotypes from the UK10K cohorts and 1000 Genomes Phase 1 data [33,34]. Single-sample  
452 VCFs were merged and subsequent QC was performed using Genotype Harmonizer [35] and  
453 BCFtools. Variants with INFO score lower than 0.4 were excluded from further analysis.

## 454 Demultiplexing donors from pooled experiments

455 Assignment of cells to donors was performed using Cardelino [36]. Briefly, Cardelino estimates  
456 the posterior probability of a cell originating from a given donor based on common variants in  
457 scRNA-seq reads, while employing a beta binomial-based Bayesian approach to account for  
458 technical factors (e.g. differences in read depth, allelic drop-out, and sequencing accuracy).  
459 For this assignment step, we considered a larger set of  $n = 490$  HipSci lines with genotype  
460 information, which included the 126 lines used in this study. A cell was assigned to a donor if  
461 the model identified the match with posterior probability  $> 0.9$ , requiring a minimum of 10  
462 informative variants for assignment. Cells for which the donor identification was not successful  
463 were not considered further. Across the full dataset 99% of cells that passed RNA QC steps  
464 (below) were successfully assigned to a donor.

## 465 scRNA-seq quality control and processing

466 Adapters of raw scRNA-seq reads were trimmed using Trim Galore! [37–39], using default  
467 settings. Trimmed reads were mapped to the human reference genome build 37 using STAR  
468 [40] (version: 020201) in two-pass alignment mode, using the default settings proposed by the  
469 ENCODE consortium (STAR manual). Gene-level expression quantification was performed  
470 using Salmon [41] (version: 0.8.2), using the “--seqBias”, “--gcBias” and “VBOpt” options using  
471 ENSEMBL transcripts (built 75) [42]. Transcript-level expression values were summarized at  
472 a gene level (estimated counts per million (CPM)) and quality control of scRNA-seq data was  
473 performed with the *scater* Bioconductor package in R [43]. Cells were retained for downstream  
474 analyses if they had at least 50,000 counts from endogenous genes, at least 5,000 genes with  
475 non-zero expression, less than 90% of counts came from the 100 highest-expressed genes,  
476 less than 15% of reads mapping to mitochondrial (MT) genes, they had a Salmon mapping  
477 rate of at least 60%, and if the cell was successfully assigned to a donor (**Fig. S15**). Dead

478 cells as identified based on 7AAD staining were discarded. Size factor normalization of counts  
479 was performed using the *scrn* Bioconductor package in R [44]. Expressed genes with an  
480 HGNC symbol were retained for analysis, where expressed genes in each batch of samples  
481 were defined based on i) raw count > 100 in at least one cell prior to QC and ii) average  
482  $\log_2(\text{CPM}+1) > 1$  after QC. Normalized CPM data were log transformed ( $\log_2(\text{CPM}+1)$ ) for all  
483 downstream analyses. The joint dataset was investigated for outlying cell lines or experimental  
484 batches, which identified no clear groups of outlying cells (**Fig. S16, S17**).

485  
486 As a final QC assessment, we considered possible differences between cell lines from healthy  
487 and diseased donors. In particular, a subset of 11 cell lines were derived from neonatal  
488 diabetes patients, and differentiated together with cell lines from healthy donors across 7  
489 experiments (out of 28). There was no detectable difference in differentiation capacity between  
490 healthy and neonatal diabetes lines in these experiments ( $P > 0.05$ ), and cells from both sets  
491 of donors overlapped in principal component space (**Fig. S18**). Thus, we included cells from  
492 all donors in our analyses irrespective of disease state.

493  
494 The final merged and QC'ed dataset consisted of 36,044 cells with expression profiles for  
495 11,231 genes (**Fig. S2**).

## 496 Bulk RNA-Seq quality control and processing

497 Raw RNA-seq data for 546 HipSci cell-lines were obtained from the ENA project: ERP007111  
498 and EGA projects: EGAS00001001137 and EGAS00001000593. CRAM files were merged  
499 per cell-line and converted to FASTQ format. Processing of the merged FASTQ files was  
500 matched to the single cell processing, as described above. Samples with low quality RNA-seq  
501 were discarded based on the following criteria: lines with less than 2 billion bases aligned, with  
502 less than 30% coding bases, or with a duplication rate higher than 75%. This resulted in 540  
503 lines for analysis, 108 of which had matched (day0) single cell RNA-seq data available.

504  
505 Gene-level expression levels were quantified using Salmon, analogously to the alignment, as  
506 described for the single cells. Gene expression profiles were normalized using *scrn*, to match  
507 the single cell data processing, and the *scrn* normalized CPM data is log transformed  
508 ( $\log_2(\text{CPM}+1)$ ).

## 509 Variance component analysis

510 Variance component analysis was performed, per gene, by fitting a random effects model  
511 using LIMIX [45] to the gene's expression profiles across cells. To reduce computational cost,  
512 we considered a random subset of 5,000 cells. The experiment, day of collection, and cell line  
513 identity were each included as random effects. Full variance component results for all genes  
514 are provided in **Table S14**.

## 515 Highly variable genes

516 The top highly variable genes were computed using *scrn*'s *trendVar* and *decomposeVar*  
517 functions, using a design matrix to correct for the differentiation experiment-specific effects  
518 (i.e. treating each experiment as a different batch). At FDR < 1%, this identified 4,546 highly  
519 variable genes.

## 520 Pseudotime definition

521 We used the first principal component calculated based on the top 500 highly variable genes  
522 in our set to represent differentiation pseudotime. This component was linearly re-scaled to  
523 take values between 0 (the minimum value observed for any cell) and 1 (the highest value  
524 observed). For comparison, we considered three alternative methods for defining pseudo time:

525

526 (i) We considered diffusion pseudotime (DPT) [46] (**Fig. S7A**). The underlying diffusion map  
527 was generated using 15 nearest neighbours and with gene expression represented by the first  
528 20 PCs across the top 500 most highly variable genes. DPT analysis was carried out using  
529 the default settings with Scanpy v1.2.2 [47]. There was a Pearson correlation of 0.82 between  
530 DPT and the pseudotime definition we used.

531

532 (ii) We considered calculating pseudotime by projecting each cell on to the principal curve of  
533 the first two principal components of the top 500 most highly variable genes (**Fig. S7B**).  
534 Principal curve analysis was performed using the R package *princurve* [48]. There was a  
535 Pearson correlation of 0.86 between the principal curve pseudotime and the pseudotime  
536 definition we used.

537

538 (iii) We considered representing pseudotime by the mean expression of the differentiation co-  
539 expression module. This gene cluster was enriched for GO terms associated with  
540 differentiation including 'anatomical structure morphogenesis' (GO:0009653),  
541 'anterior/posterior pattern specification' (GO:0009952), and 'response to BMP' (GO:0071772)  
542 (**Table S9; Fig. S7C**). There was a Pearson correlation of 0.64 between the differentiation co-  
543 expression module and the pseudotime definition we used. The lower concordance between  
544 pseudotime and this module is consistent with the limited set of genes included - the  
545 coexpression module only includes genes upregulated during differentiation, and therefore  
546 uses no information from changes in expression of pluripotency-associated genes.

547

## 548 Definition of mesendoderm and definitive endoderm populations

549 The stage labels post iPSC (mesendo and defendo) were defined using a combination of  
550 differentiation stages obtained using the single-cell defined pseudotime and knowledge based  
551 on canonical marker genes. Cells were assigned to the mesendo stage if they were collected  
552 at day1 or day2, and had pseudotime values between 0.15 and 0.5, corresponding to a  
553 pseudotime window around the peak expression of *Brachyury* (*T*), a marker of mesendoderm  
554 (**Fig. S8A**). Cells were assigned to the defendo stage if they were collected at day2 or day3,  
555 and had pseudotime values higher than 0.7, corresponding to a pseudotime window with  
556 maximal expression of *GATA6*, a marker of definitive endoderm (**Fig. S8B**). Cells with  
557 intermediate pseudotime (between 0.5 and 0.7) mostly came from day2, and were not  
558 assigned to any stage for the purposes of the initial stage QTL mapping (results shown in **Fig.**  
559 **2**). Overall, we assign 28,971 (80%) cells to any of the stages (iPSC, mesendo, defendo).



## 560 Identification of genetic and molecular markers for differentiation 561 efficiency

562 Differentiation efficiency for each cell line was defined as its average pseudotime across cells  
563 at day3, quantified for each experiment and unique donor. To test for associations with  
564 molecular markers, we considered stage-specific gene expression levels, again quantified for  
565 each donor and experiment (as  $\log_2(\text{CPM} + 1)$ ).

566  
567 Three sets of tests were performed. In each case, models were fitted using the lme4 package  
568 in R [49], and significance was determined by the Likelihood ratio test. The tested model was:

$$569 \quad \textit{Differentiation efficiency} = \textit{Marker} + \textit{Experiment} + \textit{Donor} + \varepsilon$$

570  
571  
572 Where Experiment is a random effect grouping sets of samples from the same experiment,  
573 and Donor is a random effect grouping samples from the same donor (and cell line). Two sets  
574 of Markers were tested - genetic markers (i.e. eQTL SNPs), and expression markers (i.e.  
575 expression levels in the iPSC stage/day0), and are presented in **Table S6**, **Table S7**,  
576 respectively. For genetic markers, tests were limited to the lead eQTL variant per eGene and  
577 differentiation stage.

578  
579 Genetic markers were validated using data from independent differentiations of individual cell  
580 lines. Here, the percentage of CXCR4+ on day 3 (as measured by FACS) was used as a  
581 measure of differentiation efficiency, with the following model:

$$582 \quad \% \textit{CXCR4+} = \textit{Marker} + \varepsilon$$

583  
584  
585 Two sets of tests were performed: (1) all 5 associations (FDR 20%) were tested using data  
586 from the original set of cell lines; (2) the strongest association, with the eQTL variant for *DPH3*,  
587 was tested using data from new cell lines selected according to their genotype at this locus.

588  
589 Expression markers were validated by comparison to bulk RNA-sequencing at the iPSC stage  
590 (day0). In particular, we tested the association between gene expression in the same cell lines,  
591 assayed in separate experiments by bulk RNA-seq of iPSCs, with differentiation efficiency in  
592 our experiments, using the model:

$$593 \quad \textit{Differentiation efficiency} = \textit{Marker bulk expression in iPSCs} + \varepsilon$$

594  
595  
596 Results of the replication p-values and directions of effect are provided in **Table S7**.

597  
598 To evaluate whether donor sex had a significant effect on differentiation, we fit the following  
599 linear mixed model:

$$600 \quad \textit{Differentiation efficiency} = \textit{Sex} + \textit{Experiment} + \textit{Donor} + \varepsilon$$

601  
602  
603 In this model Sex was modelled as a fixed effect and tested for significance using likelihood  
604 ratio test, and Experiment and Donor were modelled as random effects, as above.

## 605 *cis* eQTL mapping

606 A consistent eQTL mapping strategy was applied to bulk RNA-seq expression and expression  
607 traits derived from scRNA-seq. We considered common variants (minor allele frequency > 5%)  
608 within a *cis*-region spanning 250kb up- and downstream of the gene body for *cis* QTL analysis.  
609 Association tests were performed using a linear mixed model (LMM), accounting for population  
610 structure and sample repeat structure (see below) as random effects (using a kinship matrix  
611 estimated using PLINK [50]). All models were fitted using LIMIX [45]. The values of all features  
612 were standardized and the significance was tested using a likelihood ratio test (LRT). To adjust  
613 for global differences in expression across samples, we included the first 10 principal  
614 components calculated on the expression values in the model, as covariates. In order to adjust  
615 for multiple testing, we used an approximate permutation scheme, analogous to the approach  
616 proposed in [51]. Briefly, for each gene, we generated 1,000 permutations of the genotypes  
617 while keeping covariates, kinship, and expression values fixed. We then adjusted for multiple  
618 testing using this empirical null distribution. To control for multiple testing across genes, we  
619 then applied the Storey procedure [52]. Genes with significant eQTL were reported at an FDR  
620 < 10%.  
621

## 622 Mapping *cis* eQTL across three stages of differentiation from scRNA-seq 623 data

624 To map eQTL based on scRNA-seq profiles, we quantified average gene expression profiles  
625 ( $\log_2(\text{CPM} + 1)$ ) across cells for each (donor, day of collection, experiment) combination. This  
626 approach retains differences across experiments and days, for cells from the same donor, and  
627 is enabled by the pooled experimental design. Accounting for population structure using a  
628 kinship matrix is especially important in this context, since aggregated expression values for  
629 the same donor from different experiments are essentially replicates and hence genetically  
630 identical. We separately mapped eQTL for each differentiation stage (i.e. iPSC, mesendo,  
631 defendo), yielding 1,833 (10,840 tested), 1,702 (10,924 tested) and 1,342 (10,901 tested)  
632 genes with an eQTL respectively (FDR<10%). eQTL results are provided in **Table S3**.  
633

634 For comparison, we performed analogous QTL analyses using all cells from day1, and day3  
635 instead of the pseudo-time based differentiation stages. This approach resulted in 1,181  
636 (10,787 tested) and 631 (10,765 tested) genes with an eQTL at day 1 and 3 respectively  
637 (**Table S5**).

## 638 Mapping dynamic eQTL (visualisation purposes only)

639 We performed eQTL mapping across a sliding window on pseudotime, considering bins that  
640 contain 25% of all cells, sliding along the pseudotime by a step of 2.5% of cells (**Fig. 4A**, top  
641 middle panel). Similarly to the approach taken for eQTL analysis in individual differentiation  
642 stages, expression values are averaged by (donor, day, experiment) combinations, within  
643 each window.

## 644 Mapping *cis* eQTL in iPSCs with bulk RNA-seq

645 To perform *cis*-eQTL mapping in the bulk RNA-seq data, we considered cell lines that had  
646 been used to map iPSC eQTL from the scRNA-seq data (bulk data was available for 108

647 donors out of the 112 day0 single cell donors), and tested the same set of genes. This yielded  
648 2,908 significant genes at an FDR of 10% (out of 10,736 genes tested).

649

650 To compare the iPSC eQTL maps derived from bulk and single-cell RNA-seq data, we  
651 assessed the nominal significance ( $P < 0.05$ ) as well as the consistent direction of effect of  
652 single-cell iPSC eQTL lead variants (top variant per gene) in the full set of results from the  
653 bulk iPSC eQTL analysis and vice versa.

## 654 SNP tagging

655 We used LD tagging to account for linkage disequilibrium (LD) effects that might cause false  
656 positive lead switches and to identify links between GWAS implicated variants and eQTL. To  
657 this end, we calculated the LD between lead eQTL variants and either GWAS variants or other  
658 eQTL lead variants, using both the 1000 genomes phase3 reference panel and the HipSci  
659 dataset to calculate LD between SNPs, taking the union of both sets.

## 660 Lead switching event quantification

661 Lead switching events were defined as two or three distinct variants that were identified at  
662 distinct differentiation stages, found to be significantly associated ( $FDR < 10\%$ ) with the same  
663 genes, and that were not in LD ( $r^2 < 0.2$ ).

## 664 GWAS Tagging

665 We performed GWAS tagging using an LD threshold of  $r^2 > 0.8$ . We considered all GWAS  
666 variants from the GWAS catalog as available as part of ENSEMBL 94 [53], for all traits and  
667 diseases. This analysis was restricted to variants that reached genome-wide significance ( $P$   
668  $< 5e-8$ ) for any of the traits.

## 669 Allele-specific expression quantification

670 Duplicated reads were removed from the STAR alignments using Picard Tools  
671 (<http://broadinstitute.github.io/picard>). ASE was quantified at the gene level relative to a  
672 heterozygous eQTL lead variant. As a result, for a given eQTL, ASE was only quantified across  
673 cells from donors heterozygous for that eQTL variant. This was done following five steps (see  
674 **Fig. S19** for a worked example of one gene in one cell): (1) ASE counts were obtained using  
675 GATK tools v3.7 in ASEReadCounter mode, with the settings “-minDepth 1 --  
676 minMappingQuality 10 --minBaseQuality 2 -rf DuplicateRead”. ASE of a SNP in a given cell  
677 was quantified if (i) the cell was heterozygous for that SNP, based on the known donor  
678 genotypes, and (ii) the SNP was located in an exonic region (ENSEMBL 75 annotation, as  
679 above). The output from GATK tools gives the number of reads mapping to the alternative and  
680 reference alleles for each heterozygous SNP in each cell. (2) For each cell, ASE  
681 quantifications for each SNP were converted from “alternative allele reads” to “chrB allele  
682 reads” using the known phase (indicated as chrA|chrB, where 0=reference, 1=alternative) of  
683 each SNP in each donor (e.g. for a SNP with the phase “1|0”, the alternative allele is on chrA,  
684 so the number of reads mapping to chrB = number of reference allele reads = total number of  
685 reads - number of alternative allele reads). Thus, for each cell, ASE for all SNPs was quantified  
686 relative to the genotypes of the chromosomes of that individual, rather than to “reference” or  
687 “alternative” alleles. (3) Aggregation of ASE from SNP-level to gene-level. For each gene, this

688 was done by summing the “chrB allele reads” and “total reads” across all SNPs contained in  
689 the exons of that gene (as described in the ENSEMBL 75 GTF file). (4) Conversion of  
690 quantifications from “chrB allele reads” to “reads from the chromosome containing the  
691 alternative allele of the eQTL SNP”, again by using the available phasing information. For each  
692 eQTL (i.e. each gene-SNP pair), this provides a consistent definition of ASE across all cells  
693 heterozygous for the eQTL SNP (i.e. across cells from multiple donors). Donors that are not  
694 heterozygous at the eQTL variant of interest were not used for quantification. (5) Conversion  
695 to allelic fractions i.e. quantifications express the allelic reads as a fraction of the total number  
696 of reads.  
697

## 698 ASE association tests with cellular factors

699 ASE quantifies the relative expression of one allele over the other. If one of these alleles is  
700 more responsive to a particular environmental factor (e.g. because of preferential transcription  
701 factor binding), then ASE is expected to vary systematically with that factor. This observation  
702 has previously been used to identify GxE interactions in gene expression across individuals  
703 [23]. Here, we applied similar concepts to single-cell RNA-seq, testing for the influence of  
704 cellular environmental factors (i.e. cellular processes) on ASE in individual cells. Importantly,  
705 these ASE tests are “internally matched”, as potentially confounding batch effects and  
706 technical variation affect both alleles in each cell similarly.  
707

708 Five sets of tests were performed, in a linear modelling framework (**Fig. 5, S13; Tables S13**):  
709

710 (1) Linear pseudotime (“*pseudo*”) tests. The ASE of each gene-eQTL pair was tested for  
711 association with pseudotime, across all cells in which ASE was quantified for that pair:  
712

$$713 \quad ASE = pseudo + \varepsilon$$

714

715 (2) Quadratic pseudotime tests. As (1), but with linear pseudotime as a covariate:  
716

$$717 \quad ASE = pseudo + \mathbf{pseudo^2} + \varepsilon$$

718

719 (3) Linear cellular factor test. As (1), but with each of 4 cellular factors (“*factor*”) (respiratory  
720 metabolism, sterol biosynthesis, G1/S transition and G2/M transition):  
721

$$722 \quad ASE = factor + \varepsilon$$

723

724 (4) Pseudotime-corrected linear cellular factor test. As (3), but with pseudotime included as a  
725 covariate:  
726

$$727 \quad ASE = pseudo + factor + \varepsilon$$

728

729 (5) Combined pseudotime-factor test. As (4), but testing for the additional effect of (pseudotime  
730 x factor) included as a covariate:  
731

$$732 \quad ASE = pseudo + factor + (pseudo \times factor) + \varepsilon$$

733

734 In each case, tests were only performed for eQTL for which ASE was quantified in at least 500  
735 cells. Tests were performed using the statsmodels package in Python (likelihood ratio test).  
736 Multiple testing correction was performed independently for each of the five sets of tests, using  
737 Benjamini-Hochberg correction.

738

### 739 Binning ASE across pseudotime

740 For visualizing ASE as a function of pseudotime or other cellular factors, we averaged ASE  
741 across bins of 25% of cells, as done for the sliding window eQTL analysis (above). For each  
742 (eQTL x bin) combination, the mean ASE, number of cells, standard deviation, and standard  
743 error of the mean (SEM) was calculated (noting that, while each bin contains an equal number  
744 of cells, not all cells have quantified ASE for each gene). For each eQTL, to calculate the  
745 dynamics of allelic expression across pseudotime (i.e. the expression of transcripts from the  
746 ALT and REF chromosomes, as plotted in **Fig. 4C**), two calculations were performed. First,  
747 the mean expression of each gene across the pseudotime bins was calculated using all cells  
748 heterozygous for the eQTL SNP (i.e. the cells in which ASE was quantified). The expression  
749 of each allele in each pseudotime bin was then calculated by taking the mean ASE +/- SEM,  
750 multiplied by the mean expression of that gene (in CPM) in that bin.

### 751 Coexpression and covariation clustering

752 Grouping of pseudotime-smoothed gene expression and allele-specific expression (see  
753 below) was performed by spectral clustering, as implemented by the Python scikit-learn library  
754 (**Fig. 4**). The negative of the Pearson correlation was used as the dissimilarity metric. A range  
755 of cluster numbers were tried, with N = 4 judged to be the most clusters possible before highly  
756 correlated pairs of clusters were observed.

757

758 Grouping of genes by single-cell co-expression was performed using affinity propagation [54],  
759 as implemented by the Python scikit-learn library [55]. The Pearson correlation across all cells  
760 was used as the similarity/'affinity' metric. The top 8,000 highest expressed genes were  
761 included in this clustering (as judged by average expression across all cells). This generated  
762 a set of 60 co-expression clusters. GO enrichment of each cluster was performed by Fisher's  
763 exact test in Python using GOATOOLS [56], and results are listed in **Table S9** (FDR 10%).

764

765 Exemplar co-expression clusters were selected to represent 4 dimensions of cellular state  
766 (**Fig 5A**): cell cycle G1/S transition (cluster 10), cell cycle G2/M transition (cluster 30), cellular  
767 respiration (cluster 0), and sterol biosynthesis (cluster 28). This selection was done according  
768 to two criteria: (1) strongest enrichment of relevant GO terms. The co-expression clusters  
769 showed the largest overrepresentation of genes for the GO terms 'G1/S transition of mitotic  
770 cell cycle' (GO:0000082; cluster 10), 'G2/M transition of mitotic cell cycle' (GO:0000086;  
771 cluster 30), 'respiratory electron transport chain' (GO:0022904; cluster 0), and 'sterol  
772 biosynthetic process' (GO:0016126; cluster 28). (2) *a priori* expectation of sources of cell-to-  
773 cell variation. Variation in cell cycle stage is a common feature of single-cell datasets [20],  
774 while variation in metabolic state during iPSC differentiation is well known [57].

775

### 776 ChIP-seq experiments and data processing

777 ChIP-seq was performed using FUCCI-Human Embryonic Stem Cells (FUCCI-hESCs, H9  
778 from WiCell) in a modified endoderm differentiation protocol to that used for the iPSC



779 differentiations (see details below). Cells were grown in defined culture conditions as  
780 described previously [58]. Pluripotent cells were maintained in Chemically Defined Media with  
781 BSA (CDM-BSA) supplemented with 10ng/ml recombinant Activin A and 12ng/ml recombinant  
782 FGF2 (both from Dr. Marko Hyvonen, Dept. of Biochemistry, University of Cambridge) on 0.1%  
783 Gelatin and MEF media coated plates. Cells were passaged every 4-6 days with collagenase  
784 IV as clumps of 50-100 cells. The culture media was replaced 48 hours after the split and then  
785 every 24 hours.

786  
787 The generation of FUCCI-hESC lines has been described in [59] and are based on the FUCCI  
788 system described in [60]. hESCs were differentiated into endoderm as previously described  
789 [61]. Following FACS sorting, Early G1 (EG1) cells were collected and immediately placed into  
790 the endoderm differentiation media and time-points were collected every 24h up to 72h.  
791 Endoderm specification was performed in CDM with Polyvinilic acid (CDM-PVA)  
792 supplemented with 20ng/ml FGF2, 10 $\mu$ M Ly-294002 (Promega), 100ng/ml Activin A, and  
793 10ng/ml BMP4 (R&D).

794  
795 We performed ChIP as described previously [62]. For ChIP-sequencing, ChIP for various  
796 histone marks (H3K4me3, H3K27me3, H3K4me1, H3K27ac, H3K36me3) (see **Table S15** for  
797 antibodies) was performed on two biological replicates per condition. At the end of the ChIP  
798 protocol, fragments between 100bp and 400bp were used to prepare barcoded sequencing  
799 libraries. 10ng of input material for each condition were also used for library preparation and  
800 later used as a control during peak calls. The libraries were generated by performing 8 PCR  
801 cycles for all samples. Equimolar amounts of each library were pooled and this multiplexed  
802 library was diluted to 8pM before sequencing using an Illumina HiSeq 2000 with 75bp paired-  
803 end reads.

804  
805 Reads were mapped to GRCh38 reference assembly using BWA [63]. Only reads with  
806 mapping quality score  $\geq 10$  and aligned to autosomal and sex chromosomes were kept for  
807 further processing. Peak calling analysis [64] was performed using PeakRanger [65], and only  
808 the peaks that were reproducible at an FDR of  $\leq 0.05$  in two biological replicates were selected  
809 for further processing. Peak calling was done using appropriate controls with the tool  
810 `peakranger 1.18` in modes `ranger` (H3K4me3, H3K27ac; '-l 316 -b 200 -q 0.05'), `ccat`  
811 (H3K27me3; '-l 316 --win\_size 1000 --win\_step 100 --min\_count 70 --min\_score 7 -q 0.05')  
812 and `bcp` (H3K4me1, H3K36me3; '-l 316'). Adjacent peak regions closer than 40 bp were  
813 merged using the BEDTools suite [66], and those overlapping ENCODE blacklisted regions  
814 were filtered out (ENCODE Excludable Mappability Regions [67]). Finally, peaks were  
815 converted to GRCh37 coordinates using UCSC LiftOver [68].

## 816 Data availability

817 All HipSci data can be accessed from <http://www.hipsci.org>. Bulk RNA-seq data are available  
818 under accession numbers: ERP007111 (ENA project) and EGAS0000100113,  
819 EGAS00001000593 (EGA projects). Single cell RNA-seq data for the open access lines  
820 (study 3963) are available under the accession numbers ERP016000 (ENA project).

## 821 Acknowledgements

822 This work was funded with a strategic award from the Wellcome Trust and Medical Research  
823 Council (WT098503). We thank the staff in the Cellular Genetics and Phenotyping and  
824 Sequencing core facilities at the Wellcome Trust Sanger Institute. D.D.S. and M.J.B. were  
825 supported by fellowships from the EMBL Interdisciplinary Postdoc (EI3POD) program under  
826 Marie Skłodowska-Curie Actions COFUND (grant number 664726). The Ludovic Vallier (L.V.)  
827 lab is funded by the ERC advance grant New-Chol and the core support grant from the  
828 Wellcome Trust and Medical Research Council to the Wellcome–Medical Research Council  
829 Cambridge Stem Cell Institute. We thank Yuanhua Huang (Stegle Lab) for assistance in  
830 applying the Cardelino software, and Anna Osnato (Vallier Lab) for assistance with ChIP-seq  
831 data.

## 832 Author contributions

833 Wrote the paper with input from all authors - A.C., D.S., J.M., O.S.  
834 Pilot study - M.C., F.B., D.M., A.K., K.N.  
835 Developed the experimental protocol - M.C., J.G.  
836 Experiments - M.C., J.G., I.M., S.A., A.I.  
837 eQTL mapping and analysis - A.C.  
838 scRNA-seq processing and QC - D.M., A.C.  
839 scRNA-seq exploratory data analysis - A.C., D.M., D.S.  
840 Donor mapping - D.M.  
841 Processing of the bulk RNA-seq data and genotype information - M.J.B.  
842 ChIP-seq data analysis - P.M.  
843 Allele-specific expression analysis - D.S.  
844 Differentiation efficiency marker analysis - D.S.  
845 Developed the eQTL mapping approach & pipeline - A.C., M.J.B., D.M., D.S.  
846 Supervised and designed the research - O.S., L.V., J.M., M.C.

## 847 References

- 848 1. Kilpinen H, Goncalves A, Leha A, Afzal V, Alasoo K, Ashford S, et al. Common genetic  
849 variation drives molecular heterogeneity in human iPSCs. *Nature*. 2017;546: 370–375.  
850 doi:10.1038/nature22403
- 851 2. Carcamo-Orive I, Hoffman GE, Cundiff P, Beckmann ND, D’Souza SL, Knowles JW, et  
852 al. Analysis of Transcriptional Variability in a Large Human iPSC Library Reveals Genetic  
853 and Non-genetic Determinants of Heterogeneity. *Cell Stem Cell*. 2017;20: 518–532.e9.  
854 doi:10.1016/j.stem.2016.11.005
- 855 3. Schwartzenruber J, Foskolou S, Kilpinen H, Rodrigues J, Alasoo K, Knights AJ, et al.  
856 Molecular and functional variation in iPSC-derived sensory neurons. *Nat Genet*. 2018;50:  
857 54–61. doi:10.1038/s41588-017-0005-8
- 858 4. Alasoo K, Rodrigues J, Mukhopadhyay S, Knights AJ, Mann AL, Kundu K, et al. Shared  
859 genetic effects on chromatin and gene expression indicate a role for enhancer priming in  
860 immune response. *Nat Genet*. 2018;50: 424–431. doi:10.1038/s41588-018-0046-7

- 861 5. Pashos EE, Park Y, Wang X, Raghavan A, Yang W, Abbey D, et al. Large, Diverse  
862 Population Cohorts of hiPSCs and Derived Hepatocyte-like Cells Reveal Functional  
863 Genetic Variation at Blood Lipid-Associated Loci. *Cell Stem Cell*. 2017;20: 558–570.e10.  
864 doi:10.1016/j.stem.2017.03.017
- 865 6. Hannan NRF, Segeritz C-P, Touboul T, Vallier L. Production of hepatocyte-like cells from  
866 human pluripotent stem cells. *Nat Protoc*. 2013;8: 430–437. Available:  
867 <https://www.ncbi.nlm.nih.gov/pubmed/23424751>
- 868 7. Picelli S, Faridani OR, Björklund AK, Winberg G, Sagasser S, Sandberg R. Full-length  
869 RNA-seq from single cells using Smart-seq2. *Nat Protoc*. 2014;9: 171–181.  
870 doi:10.1038/nprot.2014.006
- 871 8. Kang HM, Subramaniam M, Targ S, Nguyen M, Maliskova L, McCarthy E, et al.  
872 Multiplexed droplet single-cell RNA-sequencing using natural genetic variation. *Nat*  
873 *Biotechnol*. 2018;36: 89–94. doi:10.1038/nbt.4042
- 874 9. Chu L-F, Leng N, Zhang J, Hou Z, Mamott D, Vereide DT, et al. Single-cell RNA-seq  
875 reveals novel regulators of human embryonic stem cell differentiation to definitive  
876 endoderm. *Genome Biol*. 2016;17: 173. doi:10.1186/s13059-016-1033-x
- 877 10. Mirauta B, Seaton DD, Bensaddek D, Brenes A, Bonder MJ, Kilpinen H, et al. Population-  
878 scale proteome variation in human induced pluripotent stem cells [Internet]. 2018.  
879 doi:10.1101/439216
- 880 11. GTEx Consortium, Laboratory, Data Analysis & Coordinating Center (LDACC)—Analysis  
881 Working Group, Statistical Methods groups—Analysis Working Group, Enhancing GTEx  
882 (eGTEx) groups, NIH Common Fund, NIH/NCI, et al. Genetic effects on gene expression  
883 across human tissues. *Nature*. 2017;550: 204–213. doi:10.1038/nature24277
- 884 12. Bock C, Kiskinis E, Verstappen G, Gu H, Boulting G, Smith ZD, et al. Reference Maps of  
885 human ES and iPS cell variation enable high-throughput characterization of pluripotent  
886 cell lines. *Cell*. 2011;144: 439–452. doi:10.1016/j.cell.2010.12.032
- 887 13. Liu S, Wiggins JF, Sreenath T, Kulkarni AB, Ward JM, Leppla SH. Dph3, a small protein  
888 required for diphthamide biosynthesis, is essential in mouse development. *Mol Cell Biol*.  
889 2006;26: 3835–3841. doi:10.1128/MCB.26.10.3835-3841.2006
- 890 14. Barrero MJ, Sese B, Martí M, Izpisua Belmonte JC. Macro histone variants are critical for  
891 the differentiation of human pluripotent cells. *J Biol Chem*. 2013;288: 16110–16116.  
892 doi:10.1074/jbc.M113.466144
- 893 15. D'Amour KA, Agulnick AD, Eliazer S, Kelly OG, Kroon E, Baetge EE. Efficient  
894 differentiation of human embryonic stem cells to definitive endoderm. *Nat Biotechnol*.  
895 2005;23: 1534–1541. doi:10.1038/nbt1163
- 896 16. Anguera MC, Sadreyev R, Zhang Z, Szanto A, Payer B, Sheridan SD, et al. Molecular  
897 signatures of human induced pluripotent stem cells highlight sex differences and cancer  
898 genes. *Cell Stem Cell*. 2012;11: 75–90. doi:10.1016/j.stem.2012.03.008
- 899 17. Patel S, Bonora G, Sahakyan A, Kim R, Chronis C, Langerman J, et al. Human Embryonic  
900 Stem Cells Do Not Change Their X Inactivation Status during Differentiation. *Cell Rep*.  
901 2017;18: 54–67. doi:10.1016/j.celrep.2016.11.054
- 902 18. Sadahiro T, Isomi M, Muraoka N, Kojima H, Haginiwa S, Kurotsu S, et al. Tbx6 Induces  
903 Nascent Mesoderm from Pluripotent Stem Cells and Temporally Controls Cardiac versus

- 904 Somite Lineage Diversification. *Cell Stem Cell*. 2018;23: 382–395.e5.  
905 doi:10.1016/j.stem.2018.07.001
- 906 19. Francesconi M, Lehner B. The effects of genetic variation on gene expression dynamics  
907 during development. *Nature*. 2014;505: 208–211. doi:10.1038/nature12772
- 908 20. Buettner F, Natarajan KN, Casale FP, Proserpio V, Scialdone A, Theis FJ, et al.  
909 Computational analysis of cell-to-cell heterogeneity in single-cell RNA-sequencing data  
910 reveals hidden subpopulations of cells. *Nat Biotechnol*. 2015;33: 155–160.  
911 doi:10.1038/nbt.3102
- 912 21. Buettner F, Pratanwanich N, McCarthy DJ, Marioni JC, Stegle O. f-sclVM: scalable and  
913 versatile factor analysis for single-cell RNA-seq. *Genome Biol*. 2017;18: 212.  
914 doi:10.1186/s13059-017-1334-8
- 915 22. Fan J, Salathia N, Liu R, Kaeser GE, Yung YC, Herman JL, et al. Characterizing  
916 transcriptional heterogeneity through pathway and gene set overdispersion analysis. *Nat*  
917 *Methods*. 2016;13: 241–244. doi:10.1038/nmeth.3734
- 918 23. Knowles DA, Davis JR, Edgington H, Raj A, Favé M-J, Zhu X, et al. Allele-specific  
919 expression reveals interactions between genetic variation and environment. *Nat Methods*.  
920 2017;14: 699–702. doi:10.1038/nmeth.4298
- 921 24. Moyerbrailean GA, Richards AL, Kurtz D, Kalita CA, Davis GO, Harvey CT, et al. High-  
922 throughput allele-specific expression across 250 environmental conditions. *Genome Res*.  
923 2016;26: 1627–1638. doi:10.1101/gr.209759.116
- 924 25. Chahal HS, Wu W, Ransohoff KJ, Yang L, Hedlin H, Desai M, et al. Genome-wide  
925 association study identifies 14 novel risk alleles associated with basal cell carcinoma. *Nat*  
926 *Commun*. 2016;7: 12510. doi:10.1038/ncomms12510
- 927 26. Gudmundsson J, Sulem P, Gudbjartsson DF, Blondal T, Gylfason A, Agnarsson BA, et  
928 al. Genome-wide association and replication studies identify four variants associated with  
929 prostate cancer susceptibility. *Nat Genet*. 2009;41: 1122–1126. doi:10.1038/ng.448
- 930 27. Heiden MG, Vander Heiden MG, Cantley LC, Thompson CB. Understanding the  
931 Warburg Effect: The Metabolic Requirements of Cell Proliferation [Internet]. *Science*.  
932 2009. pp. 1029–1033. doi:10.1126/science.1160809
- 933 28. Ferreira MA, Vonk JM, Baurecht H, Marenholz I, Tian C, Hoffman JD, et al. Shared  
934 genetic origin of asthma, hay fever and eczema elucidates allergic disease biology. *Nat*  
935 *Genet*. 2017;49: 1752–1757. doi:10.1038/ng.3985
- 936 29. Tang X-F, Zhang Z, Hu D-Y, Xu A-E, Zhou H-S, Sun L-D, et al. Association analyses  
937 identify three susceptibility Loci for vitiligo in the Chinese Han population. *J Invest*  
938 *Dermatol*. 2013;133: 403–410. doi:10.1038/jid.2012.320
- 939 30. Blake LE, Thomas SM, Blischak JD, Hsiao CJ, Chavarria C, Myrthil M, et al. A  
940 comparative study of endoderm differentiation in humans and chimpanzees. *Genome*  
941 *Biol*. 2018;19: 162. doi:10.1186/s13059-018-1490-5
- 942 31. Yiangou L, Ross ADB, Goh KJ, Vallier L. Human Pluripotent Stem Cell-Derived Endoderm  
943 for Modeling Development and Clinical Applications. *Cell Stem Cell*. 2018;22: 485–499.  
944 doi:10.1016/j.stem.2018.03.016
- 945 32. Howie BN, Donnelly P, Marchini J. A flexible and accurate genotype imputation method

- 946 for the next generation of genome-wide association studies. *PLoS Genet.* 2009;5:  
947 e1000529. doi:10.1371/journal.pgen.1000529
- 948 33. Delaneau O, Marchini J, Zagury J-F. A linear complexity phasing method for thousands  
949 of genomes. *Nat Methods.* 2011;9: 179–181. doi:10.1038/nmeth.1785
- 950 34. UK10K Consortium, Walter K, Min JL, Huang J, Crooks L, Memari Y, et al. The UK10K  
951 project identifies rare variants in health and disease. *Nature.* 2015;526: 82–90.  
952 doi:10.1038/nature14962
- 953 35. Deelen P, Bonder MJ, van der Velde KJ, Westra H-J, Winder E, Hendriksen D, et al.  
954 Genotype harmonizer: automatic strand alignment and format conversion for genotype  
955 data integration. *BMC Res Notes.* 2014;7: 901. doi:10.1186/1756-0500-7-901
- 956 36. McCarthy DJ, Rostom R, Huang Y, Kunz DJ, Danecek P, Bonder MJ, et al. Cardelino:  
957 Integrating whole exomes and single-cell transcriptomes to reveal phenotypic impact of  
958 somatic variants [Internet]. 2018. doi:10.1101/413047
- 959 37. Krueger F. Trim Galore. A wrapper tool around Cutadapt and FastQC to consistently  
960 apply quality and adapter trimming to FastQ files, with some extra functionality for MspI-  
961 digested RRBS-type (Reduced Representation Buisulfite-Seq) libraries. 2013. 2015.
- 962 38. Martin M. Cutadapt removes adapter sequences from high-throughput sequencing reads.  
963 *EMBnet.journal.* 2011;17: 10–12. doi:10.14806/ej.17.1.200
- 964 39. Andrews S, Others. FastQC: a quality control tool for high throughput sequence data.  
965 2010;
- 966 40. Dobin A, Davis CA, Schlesinger F, Drenkow J, Zaleski C, Jha S, et al. STAR: ultrafast  
967 universal RNA-seq aligner. *Bioinformatics.* 2013;29: 15–21.  
968 doi:10.1093/bioinformatics/bts635
- 969 41. Patro R, Duggal G, Love MI, Irizarry RA, Kingsford C. Salmon provides fast and bias-  
970 aware quantification of transcript expression. *Nat Methods.* 2017;14: 417–419.  
971 doi:10.1038/nmeth.4197
- 972 42. Zerbino DR, Achuthan P, Akanni W, Amode MR, Barrell D, Bhai J, et al. Ensembl 2018.  
973 *Nucleic Acids Res.* 2018;46: D754–D761. doi:10.1093/nar/gkx1098
- 974 43. McCarthy DJ, Campbell KR, Lun ATL, Wills QF. Scater: pre-processing, quality control,  
975 normalization and visualization of single-cell RNA-seq data in R. *Bioinformatics.* 2017;33:  
976 1179–1186. doi:10.1093/bioinformatics/btw777
- 977 44. Lun ATL, McCarthy DJ, Marioni JC. A step-by-step workflow for low-level analysis of  
978 single-cell RNA-seq data with Bioconductor. *F1000Res.* 2016;5: 2122.  
979 doi:10.12688/f1000research.9501.2
- 980 45. Casale FP, Rakitsch B, Lippert C, Stegle O. Efficient set tests for the genetic analysis of  
981 correlated traits. *Nat Methods.* 2015;12: 755–758. doi:10.1038/nmeth.3439
- 982 46. Haghverdi L, Büttner M, Wolf FA, Buettner F, Theis FJ. Diffusion pseudotime robustly  
983 reconstructs lineage branching. *Nat Methods.* 2016;13: 845–848.  
984 doi:10.1038/nmeth.3971
- 985 47. Wolf FA, Angerer P, Theis FJ. SCANPY: large-scale single-cell gene expression data  
986 analysis. *Genome Biol.* 2018;19: 15. doi:10.1186/s13059-017-1382-0



- 987 48. Hastie T, Stuetzle W. *Principal Curves*. J Am Stat Assoc. Taylor & Francis; 1989;84: 502–  
988 516. doi:10.1080/01621459.1989.10478797
- 989 49. Bates D, Mächler M, Bolker B, Walker S. *Fitting Linear Mixed-Effects Models Using lme4*.  
990 J Stat Softw. 2015;67. doi:10.18637/jss.v067.i01
- 991 50. Purcell S, Neale B, Todd-Brown K, Thomas L, Ferreira MAR, Bender D, et al. *PLINK: A*  
992 *Tool Set for Whole-Genome Association and Population-Based Linkage Analyses*. Am J  
993 Hum Genet. 2007;81: 559–575. doi:10.1086/519795
- 994 51. Ongen H, Buil A, Brown AA, Dermitzakis ET, Delaneau O. *Fast and efficient QTL mapper*  
995 *for thousands of molecular phenotypes*. Bioinformatics. 2016;32: 1479–1485.  
996 doi:10.1093/bioinformatics/btv722
- 997 52. Storey JD, Tibshirani R. *Statistical significance for genomewide studies*. Proceedings of  
998 the National Academy of Sciences. 2003;100: 9440–9445.  
999 doi:10.1073/pnas.1530509100
- 1000 53. Buniello A, MacArthur JAL, Cerezo M, Harris LW, Hayhurst J, Malangone C, et al. *The*  
1001 *NHGRI-EBI GWAS Catalog of published genome-wide association studies, targeted*  
1002 *arrays and summary statistics 2019*. Nucleic Acids Res. 2018; doi:10.1093/nar/gky1120
- 1003 54. Frey BJ, Dueck D. *Clustering by passing messages between data points*. Science.  
1004 2007;315: 972–976. doi:10.1126/science.1136800
- 1005 55. Garreta R, Moncecchi G. *Learning scikit-learn: Machine Learning in Python [Internet]*.  
1006 Packt Publishing Ltd; 2013. Available: [https://market.android.com/details?id=book-](https://market.android.com/details?id=book-OOotAgAAQBAJ)  
1007 [OOotAgAAQBAJ](https://market.android.com/details?id=book-OOotAgAAQBAJ)
- 1008 56. Klopfenstein DV, Zhang L, Pedersen BS, Ramírez F, Warwick Vesztröcy A, Naldi A, et  
1009 al. *GOATOOLS: A Python library for Gene Ontology analyses*. Sci Rep. 2018;8: 10872.  
1010 doi:10.1038/s41598-018-28948-z
- 1011 57. Xu X, Duan S, Yi F, Ocampo A, Liu G-H, Izpisua Belmonte JC. *Mitochondrial regulation*  
1012 *in pluripotent stem cells*. Cell Metab. 2013;18: 325–332. doi:10.1016/j.cmet.2013.06.005
- 1013 58. Brons IGM, Smithers LE, Trotter MWB, Rugg-Gunn P, Sun B, de Sousa Lopes SMC, et  
1014 al. *Derivation of pluripotent epiblast stem cells from mammalian embryos*. Nature.  
1015 2007;448: 191–195. doi:10.1038/nature05950
- 1016 59. Pauklin S, Vallier L. *The Cell-Cycle State of Stem Cells Determines Cell Fate Propensity*.  
1017 Cell. 2014;156: 1338. doi:10.1016/j.cell.2014.02.044
- 1018 60. Sakaue-Sawano A, Kurokawa H, Morimura T, Hanyu A, Hama H, Osawa H, et al.  
1019 *Visualizing spatiotemporal dynamics of multicellular cell-cycle progression*. Cell.  
1020 2008;132: 487–498. doi:10.1016/j.cell.2007.12.033
- 1021 61. Vallier L, Touboul T, Chng Z, Brimpari M, Hannan N, Millan E, et al. *Early Cell Fate*  
1022 *Decisions of Human Embryonic Stem Cells and Mouse Epiblast Stem Cells Are*  
1023 *Controlled by the Same Signalling Pathways*. PLoS One. 2009;4: e6082.  
1024 doi:10.1371/journal.pone.0006082
- 1025 62. Pauklin S, Madrigal P, Bertero A, Vallier L. *Initiation of stem cell differentiation involves*  
1026 *cell cycle-dependent regulation of developmental genes by Cyclin D*. Genes Dev.  
1027 2016;30: 421–433. doi:10.1101/gad.271452.115
- 1028 63. Li H, Durbin R. *Fast and accurate short read alignment with Burrows-Wheeler transform*.

- 1029            Bioinformatics. 2009;25: 1754–1760. doi:10.1093/bioinformatics/btp324
- 1030    64. Bailey T, Krajewski P, Ladunga I, Lefebvre C, Li Q, Liu T, et al. Practical guidelines for  
1031    the comprehensive analysis of ChIP-seq data. PLoS Comput Biol. 2013;9: e1003326.  
1032    doi:10.1371/journal.pcbi.1003326
- 1033    65. Feng X, Grossman R, Stein L. PeakRanger: a cloud-enabled peak caller for ChIP-seq  
1034    data. BMC Bioinformatics. 2011;12: 139. doi:10.1186/1471-2105-12-139
- 1035    66. Quinlan AR, Hall IM. BEDTools: a flexible suite of utilities for comparing genomic features.  
1036    Bioinformatics. 2010;26: 841–842. doi:10.1093/bioinformatics/btq033
- 1037    67. ENCODE Project Consortium. An integrated encyclopedia of DNA elements in the human  
1038    genome. Nature. 2012;489: 57–74. doi:10.1038/nature11247
- 1039    68. Fujita PA, Rhead B, Zweig AS, Hinrichs AS, Karolchik D, Cline MS, et al. The UCSC  
1040    genome browser database: update 2011. Nucleic Acids Res. Oxford University Press;  
1041    2010;39: D876–D882. Available: [https://academic.oup.com/nar/article-  
1042    abstract/39/suppl\\_1/D876/2508940](https://academic.oup.com/nar/article-abstract/39/suppl_1/D876/2508940)
